# Supplementary material
Source: HighWire-hosted journal article supplement (https://www.ajnr.org/highwire/filestream/70219/field_highwire_adjunct_files/0/19-00107.pdf)
Supplement: 19-00107.pdf [file 19-00107.pdf]

**On-line Table 1: Comparison of subcortical volumes and MD values across groups<sup>a</sup>**

| Region                   | CN          | HD          | PreHD       | EarlyHD     | MidadvHD    | P Value                                                                      |
|--------------------------|-------------|-------------|-------------|-------------|-------------|------------------------------------------------------------------------------|
| Volume (mL)              |             |             |             |             |             |                                                                              |
| Left                     |             |             |             |             |             |                                                                              |
| Caudate                  | 3.5 ± 0.4   | 2.4 ± 0.6   | 2.9 ± 0.4   | 2.2 ± 0.3   | 1.9 ± 0.3   | <.001, <sup>b</sup> <.001, <sup>c</sup> <.001, <sup>d</sup> .08 <sup>e</sup> |
| Putamen                  | 4.9 ± 0.4   | 3.2 ± 0.7   | 3.8 ± 0.7   | 3.0 ± 0.5   | 2.5 ± 0.4   | <.001, <.001, .001, .022                                                     |
| Accumbens                | 0.5 ± 0.1   | 0.3 ± 0.1   | 0.4 ± 0.1   | 0.3 ± 0.1   | 0.28 ± 0.1  | <.001, .001, .25, .08                                                        |
| Pallidum                 | 2.1 ± 0.2   | 1.4 ± 0.3   | 1.6 ± 0.2   | 1.3 ± 0.3   | 1.1 ± 0.2   | <.001, <.001, <.001, .087                                                    |
| Amygdala                 | 1.5 ± 0.2   | 1.2 ± 0.2   | 1.3 ± 0.2   | 1.3 ± 0.2   | 1.0 ± 0.2   | <.001, .005, .6, .008                                                        |
| Thalamus                 | 8.1 ± 0.7   | 7.0 ± 0.9   | 7.5 ± 0.9   | 6.9 ± 0.6   | 6.4 ± 1.1   | <.001, .03, .07, .31                                                         |
| Hippocampus              | 4.2 ± 0.4   | 3.7 ± 0.4   | 3.8 ± 0.4   | 3.7 ± 0.3   | 3.3 ± 0.4   | <.001, .008, .5, .024                                                        |
| Right                    |             |             |             |             |             |                                                                              |
| Caudate                  | 3.6 ± 0.4   | 2.6 ± 0.5   | 3.0 ± 0.4   | 2.4 ± 0.4   | 2.2 ± 0.3   | <.001, <.001, .001, .13                                                      |
| Putamen                  | 4.9 ± 0.4   | 3.2 ± 0.7   | 3.7 ± 0.7   | 2.9 ± 0.4   | 2.5 ± 0.6   | <.001, <.001, .001, .07                                                      |
| Accumbens                | 0.6 ± 0.07  | 0.4 ± 0.09  | 0.5 ± 0.09  | 0.4 ± 0.07  | 0.3 ± 0.08  | <.001, .006, <.001, .036                                                     |
| Pallidum                 | 2.1 ± 0.2   | 1.4 ± 0.3   | 1.7 ± 0.2   | 1.3 ± 0.2   | 1.1 ± 0.3   | <.001, <.001, .039, .043                                                     |
| Amygdala                 | 1.6 ± 0.2   | 1.4 ± 0.2   | 1.5 ± 0.2   | 1.4 ± 0.2   | 1.1 ± 0.2   | <.001, .018, .39, .012                                                       |
| Thalamus                 | 7.4 ± 0.7   | 6.5 ± 0.7   | 6.6 ± 0.7   | 6.6 ± 0.6   | 6.0 ± 0.8   | <.001, .003, .94, .07                                                        |
| Hippocampus              | 4.3 ± 0.3   | 3.7 ± 0.5   | 3.9 ± 0.5   | 3.8 ± 0.3   | 3.2 ± 0.4   | <.001, .02, .44, .006                                                        |
| MD (μm <sup>2</sup> /ms) |             |             |             |             |             |                                                                              |
| Left                     |             |             |             |             |             |                                                                              |
| Caudate                  | 0.77 ± 0.03 | 0.88 ± 0.09 | 0.82 ± 0.02 | 0.89 ± 0.08 | 0.95 ± 0.1  | <.001, <.001, .001, .25                                                      |
| Putamen                  | 0.75 ± 0.02 | 0.87 ± 0.09 | 0.79 ± 0.04 | 0.89 ± 0.08 | 0.97 ± 0.09 | <.001, <.001, <.001, .06                                                     |
| Accumbens                | 0.83 ± 0.04 | 0.87 ± 0.07 | 0.88 ± 0.04 | 0.85 ± 0.08 | 0.89 ± 0.1  | .015, .001, .24, .3                                                          |
| Pallidum                 | 0.75 ± 0.04 | 0.78 ± 0.08 | 0.74 ± 0.04 | 0.78 ± 0.05 | 0.82 ± 0.1  | .12, .69, .06, .26                                                           |
| Amygdala                 | 0.86 ± 0.06 | 0.89 ± 0.07 | 0.89 ± 0.07 | 0.89 ± 0.06 | 0.88 ± 0.08 | .10, .22, .9, .72                                                            |
| Thalamus                 | 0.81 ± 0.02 | 0.85 ± 0.05 | 0.83 ± 0.03 | 0.87 ± 0.04 | 0.86 ± 0.06 | <.001, .048, .01, .71                                                        |
| Hippocampus              | 1.08 ± 0.05 | 1.19 ± 0.09 | 1.15 ± 0.07 | 1.20 ± 0.09 | 1.24 ± 0.1  | <.001, .002, .11, .34                                                        |
| Right                    |             |             |             |             |             |                                                                              |
| Caudate                  | 0.85 ± 0.03 | 0.94 ± 0.08 | 0.89 ± 0.03 | 0.96 ± 0.06 | 1.0 ± 0.1   | <.001, .001, .001, .16                                                       |
| Putamen                  | 0.79 ± 0.02 | 0.91 ± 0.09 | 0.84 ± 0.04 | 0.92 ± 0.07 | 1.0 ± 0.09  | <.001, <.001, <.001, .06                                                     |
| Accumbens                | 0.86 ± 0.05 | 0.84 ± 0.07 | 0.88 ± 0.04 | 0.82 ± 0.08 | 0.83 ± 0.09 | .25, .18, .008, .64                                                          |
| Pallidum                 | 0.81 ± 0.05 | 0.83 ± 0.06 | 0.81 ± 0.04 | 0.82 ± 0.07 | 0.87 ± 0.08 | .61, .35, .09, .10                                                           |
| Amygdala                 | 0.84 ± 0.03 | 0.87 ± 0.06 | 0.87 ± 0.03 | 0.86 ± 0.06 | 0.91 ± 0.1  | .04, .039, .49, .10                                                          |
| Thalamus                 | 0.84 ± 0.02 | 0.87 ± 0.06 | 0.86 ± 0.07 | 0.87 ± 0.05 | 0.88 ± 0.07 | .022, .25, .68, .79                                                          |
| Hippocampus              | 1.08 ± 0.05 | 1.15 ± 0.07 | 1.13 ± 0.06 | 1.15 ± 0.06 | 1.18 ± 0.09 | <.001, .024, .24, .35                                                        |

<sup>a</sup> Values are expressed as mean ± standard deviation.

<sup>b</sup> CN vs HD.

<sup>c</sup> CN vs preHD.

<sup>d</sup> PreHD vs earlyHD.

<sup>e</sup> EarlyHD vs midadvHD.

**On-line Table 2: Associations between imaging indicators and clinical variables within preHD and earlyHD groups<sup>a</sup>**

| Clinical Variable     | Significant Clinical-Imaging Correlations                                                                                                                                                                                                                                                                                                                                                              |                                                                                                                                                                                                                                                                                                                                                                                                                                                                                                                                                                                                                                                                                                                                         |
|-----------------------|--------------------------------------------------------------------------------------------------------------------------------------------------------------------------------------------------------------------------------------------------------------------------------------------------------------------------------------------------------------------------------------------------------|-----------------------------------------------------------------------------------------------------------------------------------------------------------------------------------------------------------------------------------------------------------------------------------------------------------------------------------------------------------------------------------------------------------------------------------------------------------------------------------------------------------------------------------------------------------------------------------------------------------------------------------------------------------------------------------------------------------------------------------------|
|                       | PreHD                                                                                                                                                                                                                                                                                                                                                                                                  | EarlyHD                                                                                                                                                                                                                                                                                                                                                                                                                                                                                                                                                                                                                                                                                                                                 |
| DBS                   | MD_L_precentral ( $r = 0.71, P < .01$ ),<br>MD_R_precuneus ( $r = 0.53, P = .04$ ),<br>MD_Ls_caudate ( $r = 0.57, P = .03$ )                                                                                                                                                                                                                                                                           | Cth_L_superior-parietal ( $r = -0.52, P = .04$ ),<br>MD_Ls_hippocampus ( $r = 0.57, P = .02$ )                                                                                                                                                                                                                                                                                                                                                                                                                                                                                                                                                                                                                                          |
| Estimated yr to onset | MD_L_precentral ( $r = -0.59, P = .02$ ),<br>MD_Rs_caudate ( $r = -0.57, P = .03$ ),<br>Vol_Ls_pallidum ( $r = 0.53, P = .04$ )                                                                                                                                                                                                                                                                        | NA                                                                                                                                                                                                                                                                                                                                                                                                                                                                                                                                                                                                                                                                                                                                      |
| TFC                   | MD_Ls_putamen ( $r = -0.61, P = .01$ ),<br>MD_Ls_amygdala ( $r = -0.79, P < .01$ )                                                                                                                                                                                                                                                                                                                     | MD_R_superior-parietal ( $r = -0.55, P = .03$ ),<br>MD_R_precentral ( $r = -0.64, P = .01$ ),<br>Cth_R_superior-parietal ( $r = 0.61, P = .01$ ),<br>Cth_R_superior-temporal ( $r = 0.65, P = .01$ ),<br>Cth_R_superior-frontal ( $r = 0.69, P < .01$ ),<br>Cth_L_inferior-parietal ( $r = 0.52, P = .04$ ),<br>Cth_L_postcentral ( $r = 0.58, P = .02$ ),<br>Cth_L_superior-frontal ( $r = 0.64, P = .01$ ),<br>Cth_L_superior-parietal ( $r = 0.51, P = .04$ ),<br>Cth_L_supramarginal ( $r = 0.51, P = .04$ ),<br>Cth_L_superior-frontal-anterior ( $r = 0.56, P = .03$ ), MD_L_superior-temporal ( $r = -0.50, P = .05$ ), MD_L_lateral-orbitofrontal-cortex ( $r = -0.54, P = .03$ )                                               |
| UHDRS_TMS             | MD_L_entorhinal ( $r = 0.78, P < .01$ ),<br>MD_R_entorhinal ( $r = 0.76, P < .01$ ),<br>MD_Ls_thalamus ( $r = 0.63, P = .01$ ),<br>MD_Ls_putamen ( $r = 0.55, P = .03$ ),<br>MD_Ls_pallidum ( $r = 0.54, P = .04$ ),<br>MD_Rs_amygdala ( $r = 0.65, P = .01$ ),<br>Vol_Ls_putamen ( $r = -0.64, P = .01$ ),<br>Vol_Ls_hippocampus ( $r = -0.52, P = .05$ ),<br>Vol_Rs_putamen ( $r = -0.60, P = .02$ ) | MD_R_cuneus ( $r = 0.54, P = .03$ ), MD_R_superior-temporal ( $r = 0.55, P = .03$ ), MD_R_superior-parietal ( $r = 0.53, P = .04$ ), MD_R_precentral ( $r = 0.55, P = .03$ ), Cth_R_superior-parietal ( $r = -0.56, P = .03$ ), Cth_R_superior-temporal ( $r = -0.66, P = .01$ ), Cth_R_superior-frontal ( $r = -0.75, P < .01$ ), Cth_L_inferior-parietal ( $r = -0.52, P = .04$ ), Cth_L_superior-frontal ( $r = -0.65, P = .01$ ), Cth_L_superior-frontal-anterior ( $r = -0.62, P = .01$ ), MD_L_pericalcarine ( $r = 0.53, P = .04$ ), MD_L_superior-temporal ( $r = 0.56, P = .02$ ), MD_L_lateral-orbitofrontal-cortex ( $r = 0.60, P = .01$ ), MD_Ls_putamen ( $r = 0.64, P = .01$ ), MD_Ls_hippocampus ( $r = 0.53, P = .04$ ) |
| Cogscore              | MD_L_entorhinal ( $r = -0.54, P = .04$ ),<br>MD_Rs_caudate ( $r = -0.63, P = .01$ ),<br>MD_Rs_hippocampus ( $r = -0.59, P = .02$ ),<br>Vol_Ls_caudate ( $r = 0.52, P = .04$ ),<br>Vol_Rs_caudate ( $r = 0.52, P = .05$ )                                                                                                                                                                               | Cth_R_superior-parietal ( $r = 0.55, P = .03$ ),<br>Cth_R_superior-temporal ( $r = 0.55, P = .04$ ),<br>Cth_R_superior-frontal ( $r = 0.81, P < .01$ ),<br>Cth_L_superior-parietal ( $r = 0.54, P = .04$ ),<br>MD_Ls_putamen ( $r = -0.62, P = .01$ ),<br>MD_Ls_hippocampus ( $r = -0.73, P < .01$ ),<br>MD_Rs_putamen ( $r = -0.65, P = .01$ ),<br>MD_Rs_hippocampus ( $r = -0.62, P = .01$ )                                                                                                                                                                                                                                                                                                                                          |
| Apathy score          | MD_Ls_thalamus ( $r = 0.58, P = .02$ ),<br>MD_Ls_caudate ( $r = 0.73, P < .01$ )                                                                                                                                                                                                                                                                                                                       | MD_Ls_hippocampus ( $r = 0.54, P = .03$ ),<br>MD_Rs_putamen ( $r = 0.54, P = .03$ ),<br>MD_Rs_hippocampus ( $r = 0.70, P < .01$ )                                                                                                                                                                                                                                                                                                                                                                                                                                                                                                                                                                                                       |
| FAS                   |                                                                                                                                                                                                                                                                                                                                                                                                        | MD_Rs_hippocampus ( $r = -0.51, P = .04$ )                                                                                                                                                                                                                                                                                                                                                                                                                                                                                                                                                                                                                                                                                              |
| SDMT                  | MD_Ls_accumbens ( $r = -0.56, P = .03$ ),<br>MD_Rs_pallidum ( $r = -0.55, P = .03$ ),<br>Vol_Rs_pallidum ( $r = 0.57, P = .03$ )                                                                                                                                                                                                                                                                       | Cth_R_superior-frontal ( $r = 0.50, P = .05$ ),<br>MD_Ls_putamen ( $r = -0.50, P = .05$ ),<br>MD_Ls_hippocampus ( $r = -0.64, P = .01$ ),<br>MD_Ls_accumbens ( $r = -0.54, P = .03$ ),<br>MD_Rs_putamen ( $r = -0.56, P = .02$ ),<br>MD_Rs_hippocampus ( $r = -0.52, P = .04$ )                                                                                                                                                                                                                                                                                                                                                                                                                                                         |
| Semantic fluency      |                                                                                                                                                                                                                                                                                                                                                                                                        | MD_Rs_putamen ( $r = -0.55, P = .03$ ),<br>MD_Rs_hippocampus ( $r = -0.50, P = .05$ ),<br>Vol_Ls_caudate ( $r = 0.51, P = .04$ ),<br>Vol_Rs_caudate ( $r = 0.56, P = .03$ )                                                                                                                                                                                                                                                                                                                                                                                                                                                                                                                                                             |

*Continued on next page*

**On-line Table 2: Continued**

| Clinical Variable         | Significant Clinical-Imaging Correlations                                                                                                                                                   |                                                                                                                                                                                                                                                                                                                                                                                                                                                                                                                                                                                                                                                                                                                                                                                                                                                                                                                                                                                              |
|---------------------------|---------------------------------------------------------------------------------------------------------------------------------------------------------------------------------------------|----------------------------------------------------------------------------------------------------------------------------------------------------------------------------------------------------------------------------------------------------------------------------------------------------------------------------------------------------------------------------------------------------------------------------------------------------------------------------------------------------------------------------------------------------------------------------------------------------------------------------------------------------------------------------------------------------------------------------------------------------------------------------------------------------------------------------------------------------------------------------------------------------------------------------------------------------------------------------------------------|
|                           | PreHD                                                                                                                                                                                       | EarlyHD                                                                                                                                                                                                                                                                                                                                                                                                                                                                                                                                                                                                                                                                                                                                                                                                                                                                                                                                                                                      |
| Stroop Color              | MD_L_superior-temporal ( $r = -0.54, P = .04$ ), MD_L_superior-frontal ( $r = -0.55, P = .04$ ), MD_R_rostral midfrontal ( $r = -0.55, P = .03$ ), MD_R_precentral ( $r = -0.62, P = .01$ ) | MD_R_cuneus ( $r = -0.63, P = .01$ ), MD_R_superior-temporal ( $r = -0.61, P = .01$ ), MD_R_superior-parietal ( $r = -0.55, P = .03$ ), MD_R_precuneus ( $r = -0.56, P = .02$ ), MD_R_precentral ( $r = -0.60, P = .01$ ), Cth_R_superior-parietal ( $r = 0.56, P = .03$ ), Cth_R_superior-temporal ( $r = 0.53, P = .03$ ), Cth_R_superior-frontal ( $r = 0.69, P < .01$ ), Cth_L_superior-frontal ( $r = 0.54, P = .03$ ), MD_L_pericalcarine ( $r = -0.62, P = .01$ ), MD_L_superior-temporal ( $r = -0.61, P = .01$ ), MD_L_lateral-orbitofrontal-cortex ( $r = -0.58, P = .02$ ), MD_L_caudate middle frontal ( $r = -0.59, P = .02$ ), MD_L_superior-parietal ( $r = -0.53, P = .04$ ), MD_Ls_thalamus ( $r = -0.50, P = .05$ ), MD_Ls_putamen ( $r = -0.77, P < .01$ ), MD_Ls_hippocampus ( $r = -0.65, P = .01$ ), MD_Rs_thalamus ( $r = -0.62, P = .01$ ), MD_Rs_caudate ( $r = -0.56, P = .02$ ), MD_Rs_putamen ( $r = -0.70, P < .01$ ), Vol_Rs_accumbens ( $r = 0.53, P = .04$ ) |
| Stroop-Word               | MD_Ls_hippocampus ( $r = -0.57, P = .03$ ), Vol_Ls_caudate ( $r = 0.63, P = .01$ ), Vol_Rs_caudate ( $r = 0.60, P = .02$ )                                                                  | MD_R_superior-parietal ( $r = -0.51, P = .04$ ), MD_R_precentral ( $r = -0.51, P = .04$ ), Cth_R_superior-parietal ( $r = 0.56, P = .03$ ), Cth_R_superior-frontal ( $r = 0.63, P = .01$ ), Cth_L_superior-parietal ( $r = 0.62, P = .01$ ), MD_Ls_putamen ( $r = -0.60, P = .01$ ), MD_Ls_hippocampus ( $r = -0.60, P = .01$ ), MD_Ls_accumbens ( $r = -0.52, P = .04$ ), MD_Rs_putamen ( $r = -0.71, P < .01$ ), MD_Rs_hippocampus ( $r = -0.52, P = .04$ ), MD_Rs_accumbens ( $r = -0.55, P = .03$ ), Vol_Rs_accumbens ( $r = 0.52, P = .04$ )                                                                                                                                                                                                                                                                                                                                                                                                                                            |
| TMT B-A                   | MD_Ls_putamen ( $r = 0.55, P = .03$ )                                                                                                                                                       | MD_Ls_accumbens ( $r = -0.52, P = .04$ ), Vol_Ls_palladium ( $r = -0.51, P = .04$ )                                                                                                                                                                                                                                                                                                                                                                                                                                                                                                                                                                                                                                                                                                                                                                                                                                                                                                          |
| TMT cognitive flexibility | MD_L_rostral midfrontal ( $r = -0.60, P = .02$ )                                                                                                                                            |                                                                                                                                                                                                                                                                                                                                                                                                                                                                                                                                                                                                                                                                                                                                                                                                                                                                                                                                                                                              |

**Note:**—Vol indicates volume; NA, not applicable; R, right; L, left; Ls, left subcortical; Rs, right subcortical; TFC, Total Functional Capacity; TMS, Total Motor Score; Cogscore, Cognitive Score; FAS, F-A-S test of verbal fluency.

<sup>a</sup>The set of clusters and subcortical structures were previously described in the text.

**On-line Table 3: Associations between imaging indicators and clinical variables within preHD and earlyHD groups<sup>a</sup>**

| Clinical Variable                                           | Significant Clinical-Imaging Correlations, Controlling for Caudate Atrophy                                                             |                                                                                                                                                                                                                                                                                                                                                                                                                                                                                                                                                                                                                                                                                                                                                                                                                                              |
|-------------------------------------------------------------|----------------------------------------------------------------------------------------------------------------------------------------|----------------------------------------------------------------------------------------------------------------------------------------------------------------------------------------------------------------------------------------------------------------------------------------------------------------------------------------------------------------------------------------------------------------------------------------------------------------------------------------------------------------------------------------------------------------------------------------------------------------------------------------------------------------------------------------------------------------------------------------------------------------------------------------------------------------------------------------------|
|                                                             | PreHD                                                                                                                                  | EarlyHD                                                                                                                                                                                                                                                                                                                                                                                                                                                                                                                                                                                                                                                                                                                                                                                                                                      |
| DBS                                                         | MD_L_precentral ( $r = 0.65, P = .02$ )                                                                                                | MD_Ls_caudate ( $r = 0.86, P = .03$ ),<br>MD_Ls_accumbens ( $r = 0.93, P = .01$ ),<br>MD_Rs_accumbens ( $r = 0.93, P = .01$ )                                                                                                                                                                                                                                                                                                                                                                                                                                                                                                                                                                                                                                                                                                                |
| Estimated yr to onset<br>TFC                                | MD_Ls_putamen ( $r = -0.60, P = .03$ ),<br>MD_Ls_amygdala ( $r = -0.79, P < .01$ )                                                     | NA<br>Cth_R_superior-temporal ( $r = 0.84, P = .04$ ),<br>Cth_L_postcentral ( $r = 0.84, P = .04$ ),<br>Cth_L_superior-frontal ( $r = 0.90, P = .01$ )                                                                                                                                                                                                                                                                                                                                                                                                                                                                                                                                                                                                                                                                                       |
| UHDRS_TMS                                                   | MD_L_entorhinal ( $r = 0.69, P = .01$ ),<br>MD_R_entorhinal ( $r = 0.70, P = .01$ ),<br>MD_Rs_amygdala ( $r = 0.69, P = .01$ )         | MD_R_precentral ( $r = 0.84, P = .04$ ),<br>Cth_R_superior-temporal ( $r = -0.88, P = .02$ ),<br>Cth_R_superior-frontal ( $r = -0.85, P = .03$ ),<br>MD_Ls_putamen ( $r = 0.97, P < .01$ ),<br>MD_Rs_putamen ( $r = 0.90, P = .01$ ),<br>MD_Rs_amygdala ( $r = 0.91, P = .01$ )                                                                                                                                                                                                                                                                                                                                                                                                                                                                                                                                                              |
| Cogscore                                                    | MD_Rs_caudate ( $r = -0.60, P = .03$ ),<br>MD_Rs_hippocampus ( $r = -0.56, P = .05$ )                                                  | MD_Ls_putamen ( $r = -0.90, P = .01$ ),<br>MD_Ls_hippocampus ( $r = -0.86, P = .03$ ),<br>MD_Rs_putamen ( $r = -0.94, P = .01$ )                                                                                                                                                                                                                                                                                                                                                                                                                                                                                                                                                                                                                                                                                                             |
| Apathy score                                                | MD_Ls_thalamus ( $r = 0.60, P = .03$ ), MD_Ls_caudate<br>( $r = 0.71, P = .01$ )                                                       | MD_Ls_hippocampus ( $r = 0.85, P = .03$ ),<br>MD_Rs_accumbens ( $r = 0.85, P = .03$ ),<br>Vol_Ls_hippocampus ( $r = 0.90, P = .02$ )                                                                                                                                                                                                                                                                                                                                                                                                                                                                                                                                                                                                                                                                                                         |
| FAS                                                         |                                                                                                                                        | Cth_L_inferior-parietal ( $r = -0.85, P = .03$ ),<br>Cth_L_postcentral ( $r = -0.88, P = .02$ ),<br>Cth_L_superior-frontal ( $r = -0.83, P = .04$ )                                                                                                                                                                                                                                                                                                                                                                                                                                                                                                                                                                                                                                                                                          |
| SDMT<br>Semantic fluency                                    | MD_Ls_accumbens ( $r = -0.62, P = .02$ )<br>MD_L_precentral ( $r = -0.56, P = .05$ )                                                   | MD_Rs_putamen ( $r = -0.86, P = .03$ )<br>MD_Ls_putamen ( $r = -0.83, P = .04$ ),<br>MD_Ls_hippocampus ( $r = -0.88, P = .02$ ),<br>MD_Rs_putamen ( $r = -0.92, P = .01$ ),<br>MD_Rs_accumbens ( $r = -0.87, P = .02$ ),<br>Vol_Ls_hippocampus ( $r = -0.83, P = .04$ ),<br>Vol_Rs_amygdala ( $r = -0.88, P = .02$ )                                                                                                                                                                                                                                                                                                                                                                                                                                                                                                                         |
| Stroop Color                                                | MD_L_superior-temporal ( $r = -0.58, P = .04$ ),<br>MD_R_precentral ( $r = -0.62, P = .03$ )                                           | MD_R_cuneus ( $r = -0.83, P = .04$ ),<br>MD_R_superior-temporal ( $r = -0.86, P = .03$ ),<br>MD_R_superior-parietal ( $r = -0.94, P = .01$ ),<br>MD_R_precuneus ( $r = -0.91, P = .01$ ),<br>MD_R_precentral ( $r = -0.94, P = .01$ ),<br>Cth_R_superior-parietal ( $r = 0.88, P = .02$ ),<br>Cth_R_superior-temporal ( $r = 0.82, P = .05$ ),<br>MD_L_pericalcarine ( $r = -0.85, P = .03$ ),<br>MD_L_superior-temporal ( $r = -0.90, P = .01$ ),<br>MD_L_lateral-orbitofrontal-cortex ( $r = -0.91, P = .01$ ), MD_L_caudal middle frontal ( $r = -0.92, P = .01$ ), MD_L_superior-parietal ( $r = -0.91, P = .01$ ), MD_Ls_thalamus ( $r = -0.85, P = .03$ ), MD_Ls_caudate ( $r = -0.84, P = .04$ ),<br>MD_Ls_putamen ( $r = -0.92, P = .01$ ),<br>MD_Ls_hippocampus ( $r = -0.88, P = .02$ ),<br>MD_Rs_putamen ( $r = -0.97, P < .01$ ) |
| Stroop-Word<br>TMT (parts B-A)<br>TMT cognitive flexibility | MD_Ls_putamen ( $r = 0.56, P = .04$ )<br>MD_L_rostral midfrontal ( $r = -0.60, P = .03$ ),<br>MD_Rs_accumbens ( $r = -0.56, P = .05$ ) | MD_Ls_amygdala ( $r = -0.84, P = .04$ )<br>Vol_Rs_hippocampus ( $r = 0.86, P = .03$ )                                                                                                                                                                                                                                                                                                                                                                                                                                                                                                                                                                                                                                                                                                                                                        |

**Note:**—TFC indicates Total Functional Capacity; TMS, Total Motor Score; Cogscore, Cognitive Score; FAS, F-A-S test of verbal fluency; Vol, volume.

<sup>a</sup> The set of clusters and subcortical structures were previously described in the text.
